# Supplementary material
Source: publisher figshare collection journal article supplement (https://acs.figshare.com/ndownloader/files/3731917)
Supplement: Supplementary file 1 [file 3731917]

## Structural insights and the surprisingly low mechanical stability of the Au-S bond in the gold-specific protein GolB

Wei Wei<sup>†, ‡, #</sup>, Yang Sun<sup>§, #</sup>, Mingli Zhu<sup>†, ‡</sup>, Xiangzhi Liu<sup>†, ‡</sup>, Peiqing Sun<sup>†, ‡</sup>, Feng Wang<sup>†</sup>, Qiu Gui<sup>‡</sup>, Wuyi Meng<sup>†</sup>, Yi Cao<sup>§ \*</sup>, Jing Zhao<sup>†, ‡ \*</sup>

<sup>†</sup> State Key Laboratory of Coordination Chemistry, Institute of Chemistry and BioMedical Sciences, School of Chemistry and Chemical Engineering, Collaborative Innovation Center of Chemistry for Life Sciences, Nanjing University, Nanjing 210093, China;

<sup>‡</sup> State Key Laboratory of Pharmaceutical Biotechnology, School of Life Sciences, Nanjing University, Nanjing 210093, China;

<sup>§</sup> Collaborative Innovation Center of Advanced Microstructures, National Laboratory of Solid State Microstructure, Department of Physics, Nanjing University, Nanjing 210093, China;

<sup>†</sup> Elias James Corey Institute of Biomedical Research, Wuxi Biortus Biosciences Co., Ltd, Jiangyin, 214437, China;

<sup>#</sup> These authors contributed equally to this work.

### Experimental Section.

**Protein expression.** The plasmid of *Salmonella typhimurium* golb gene is a generous gift from Prof. Chuan He at The University of Chicago. The gene encoding the protein GolB protein (GMQFHIDDMTCGGCASTVKKILTLDANATVRTDPATRLVDVETSLSAEQIAAALQKAGFPPRER) was amplified from the plasmid by standard polymerase chain reaction (PCR) methods. The fusion protein 6×His-MBP-TEV-GolB was sub-cloned into a pET28a vector, and the resulting construct was subsequently transformed into BL21 (DE3) cells. The fusion protein was expressed in LB medium containing 50 µg/mL kanamycin after induction with 1 mM IPTG at 15°C. To obtain purified GolB, *E.coli* BL21 (DE3) cells containing the recombinant plasmid that had been cultured overnight were collected by centrifugation. The pellet was re-suspended in buffer (50 mM Tris-HCl pH 7.0, 500 mM NaCl and 5% v/v glycerol) and dissociated by microfluid. The supernatant was obtained by centrifuging the cell lysate at 20,000 rpm and 277 K for 1 h. Standard Ni-affinity chromatography (His-Trap FF) was performed for preliminary purification of the His-tagged fusion protein from the supernatant. The enrichment fusion protein was digested by TEV protease at 277 K overnight. Ni-affinity chromatography (His Trap HP) was used again to obtain GolB, which was separated from the 6×His-MBP-TEV fusion protein. High purity GolB was obtained after further purified by size-exclusion chromatography (Superdex 30) and was concentrated.

**Crystallization.** Crystal screening was performed at 293 K by the sitting-drop vapour-diffusion method. A 200 nanolitre protein solution (4.43 mM) was mixed with 200 nanolitre reservoir solution and equilibrated against 30 microlitre reservoir solution. Commercial crystallization kits from Hampton Research and Qiagen were used for crystal screening. Initial crystals of GolB were observed under the following condition: 2.0 M ammonium citrate tribasic pH 7.0, 0.1 M BIS-TRIS propane pH 7.0. Single crystals were obtained by further optimization of salt concentration and pH values. For heavy atom derivative crystals preparation, we added 10 mM KAu(CN)<sub>2</sub> to a cryo-protection solution (2.0 M ammonium citrate tribasic pH 7.0, 0.1

M BIS-TRIS propane pH 7.0, 25% glycerol), soaked the crystals for about 4 hours and then the data were collected at home source diffraction system.

**Single-molecule AFM.** First, the gene encoding the protein GolB with a  $\beta$ -hairpin fragment (15 aa EWTYDDATKTFIVTE) from GB1 inserted in the C10XXC13 metal ion binding loop was amplified by PCR methods using the primers (GolB-beta-F: CGGGATCCATGCAGTTCCATATTGATGACATGACCTGCGGCGAATGGACCTACGACGACGCTACCAAAACCTTCACGGTTA CCGAAGGCTGCGCCAGTACGGTAAAAAAGA and GolB-R: GGGGTACCTTACTAAGATCTCCTCTCGCGCGGCGGGAAAC). Then the gene encoding the (beta GB1-GolB)<sub>4</sub> hybrid polyprotein was constructed using standard molecular biology techniques to splice GB1 and GolB with  $\beta$ -hairpin in an iterative approach<sup>1</sup>. (beta GB1-GolB)<sub>4</sub> was expressed in BL21 and purified by Ni<sup>2+</sup>-affinity chromatography. Single-molecule AFM experiments were performed on a commercial AFM (NanoWizard II, JPK Instruments, Berlin, Germany). In the force spectroscopy experiments, we first deposited 30  $\mu$ L of the protein at a concentration of around 0.3 mg/mL on a glass substrate for 5 min. Next, we filled in the fluid chamber with 1.5 mL Tris-HCl buffer (pH 7.4). Based on equipartition theorem, the cantilever (MLCT, BRUKER, USA) with a spring constant of ~40 pN/nm was then calibrated after equilibrating in the solution for around 30 min. In a typical experiment, the cantilever was brought into contact with the surface at a constant speed of 1000 nm/s. Then the cantilever stayed on the surface with a contact force of around 9 nN for 1.5 s to ensure the adhesion between protein and the tip. Subsequently, the cantilever was retracted to stretch the protein molecule being picked up from the surface. The force curves were recorded automatically by the software from JPK and then analyzed by a home-written protocol in Igor 6.37 (WaveMetrics, Lake Oswego, OR). At least 200 events were recorded of each protein and the force distributions were then fitted by Gaussian distribution.

**UV-visible measurement of metal binding experiment.** The (beta GB1-GolB)<sub>4</sub> and (GB1-GolB)<sub>4</sub> polyprotein were reduced with 1 mM DTT overnight at 4 °C and passed through 10 DG desalting column using 100 mM NaCl, 100 mM Tris-HCl, pH 7.5. About 1  $\mu$ M of GolB protein was used immediately for gold (I) binding experiment in the same buffer. For all measurements, baseline was recorded with protein itself and UV spectra differences were recorded for each measurement. Gold(I) binding was monitored as an increase in absorption band at 250-255 nm<sup>2,3</sup>. Concentration and absorbance were corrected for final volume.

**Circular dichroism experiments.** (Beta GB1-GolB)<sub>4</sub> and (GB1-GolB)<sub>4</sub>'s (around 0.04mg/mL) CD spectra in 1xPB was obtained by JASCO J-815 CD spectropolarimeter (JASCO, Japan). The experiment was done in a quartz cell with 0.1mm path length from 250nm to 190nm wavelength at the room temperature.

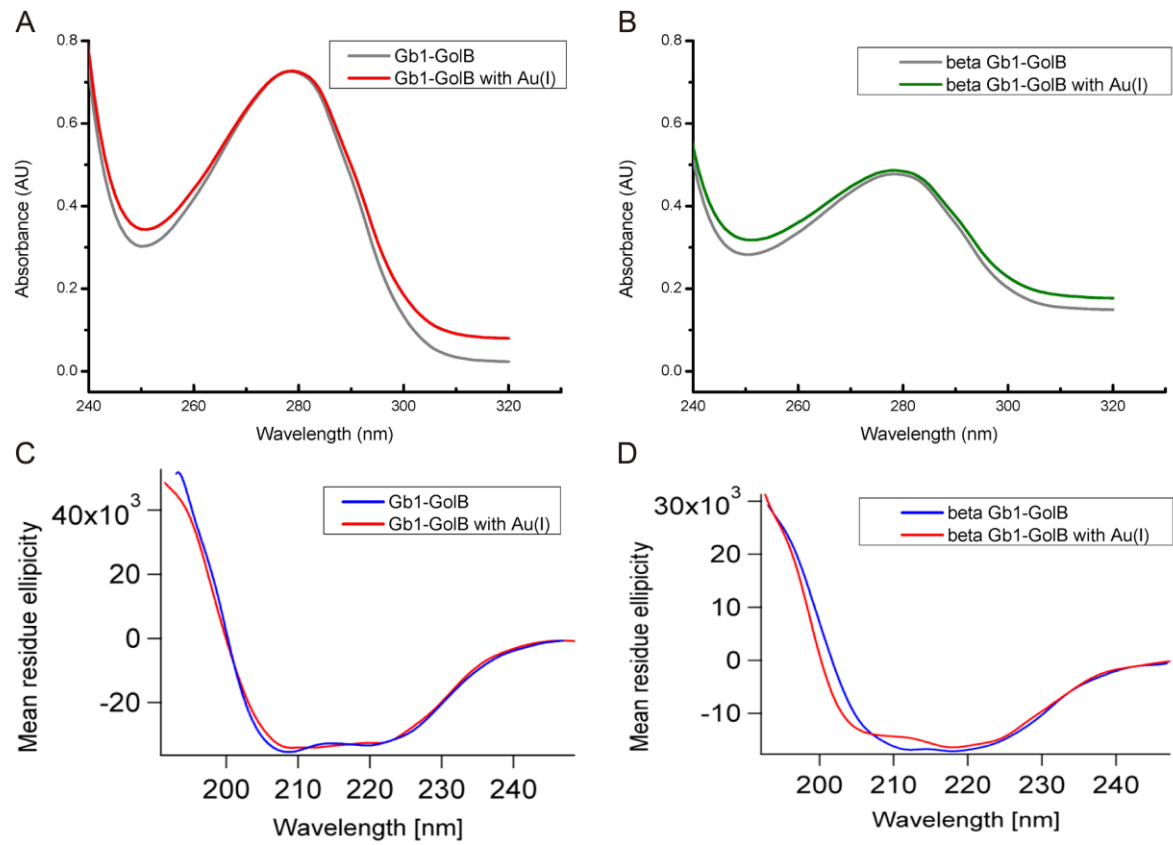

**Figure S1** UV-vis spectra of (Gb1-GolB)<sub>4</sub> protein loaded with Au(I) (A), (beta Gb1-GolB)<sub>4</sub> protein loaded with Au(I) (B), CD spectra of (Gb1-GolB)<sub>4</sub> protein loaded with Au(I) (C) and (beta Gb1-GolB)<sub>4</sub> protein loaded with Au(I) (D).

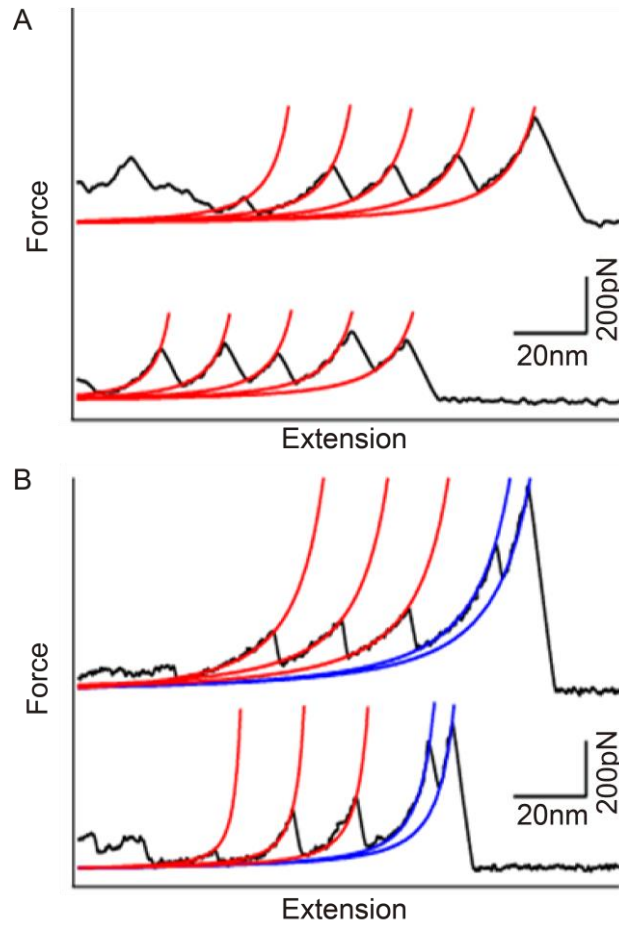

**Figure S2** Representative curves for stretching (GB1-GolB)<sub>4</sub> (A) and (beta GB1-GolB)<sub>4</sub> under oxidation conditions (B). Cys<sup>10</sup> and Cys<sup>13</sup> of GolB form intramolecular disulphide bonds in the polypeptide. Clearly, no unfolding events of GolB can be detected in both proteins, indicating that GolB is mechanically labile and unfolds at forces below the force detection limit of our AFM setup (~ 10 pN). Because the loop trapped by Cys<sup>10</sup> and Cys<sup>13</sup> in wild type GolB is too short, we can only resolve the rupture events of disulphide bonds in GolB with loop insertion (~ 9 nm) in some cases (highlighted in blue). However, because the rupture forces for disulfide bonds are much higher than the nonspecific interaction forces used to attach the polypeptide to the cantilever and the substrate, the number of events corresponding to rupture disulfide bonds are much less than the number of events for GB1 unfolding. Clearly, the rupture forces for disulfide bonds are much higher than the rupture forces for Au(I)-S or Cu(I)-S bonds in holo GolB.

**Table S1 Crystallization Method**

|                                        |                                                                        |
|----------------------------------------|------------------------------------------------------------------------|
| Method                                 | Sitting-drop vapour-diffusion                                          |
| Plate type                             | Corning 3552                                                           |
| Temperature (K)                        | 293                                                                    |
| Protein concentration                  | 31 mg/mL                                                               |
| Buffer composition of protein solution | 50 mM Tris-HCl pH 7.5, 200 mM NaCl.                                    |
| Composition of reservoir solution      | 2.0 M Ammonium citrate tribasic pH 7.0, 0.1 M BIS-TRIS propane pH 7.0. |
| Volume and ratio of drop               | 200 nL protein/200 nL reservoir                                        |
| Volume of reservoir                    | microlitre.                                                            |

**Table S2 Data collection and processing**

We finished all of the data collection works by use F-RE++ and R-Axis IV of RIGAKU.

|                                                     | Native                  | GolB(Au+ soak)          | GolB(TCEP soak)         | GolB(TCEP and Au+ soak) |
|-----------------------------------------------------|-------------------------|-------------------------|-------------------------|-------------------------|
| Diffraction source                                  | RIGAKU F-RE++           | RIGAKU F-RE++           | RIGAKU F-RE++           | RIGAKU F-RE++           |
| Wavelength (Å)                                      | 1.54                    | 1.54                    | 1.54                    | 1.54                    |
| Temperature (K)                                     | 100                     | 100                     | 100                     | 100                     |
| Detector                                            | R-Axis IV               | R-Axis IV               | R-Axis IV               | R-Axis IV               |
| Crystal-detector distance (mm)                      | 90                      | 90                      | 130                     | 140                     |
| Rotation range per image (°)                        | 0.5                     | 0.5                     | 0.5                     | 0.5                     |
| Total rotation range (°)                            | 180                     | 180                     | 90                      | 120                     |
| Exposure time per image (s)                         | 360                     | 300                     | 300                     | 300                     |
| Space group                                         | P6 <sub>5</sub> 22      | P6 <sub>5</sub> 22      | P6 <sub>5</sub> 22      | P6 <sub>5</sub> 22      |
| a, b, c (Å)                                         | 36.993, 36.993, 169.761 | 37.462, 37.462, 167.976 | 37.007, 37.007, 169.932 | 37.093, 37.093, 169.911 |
| $\alpha, \beta, \gamma$ (°)                         | 90, 90, 120             | 90, 90, 120             | 90, 90, 120             | 90, 90, 120             |
| Mosaicity (°)                                       |                         |                         |                         |                         |
| Resolution range (Å)                                | 50.00-1.40              | 50.00-1.41              | 50.00-1.80              | 50.00-2.00              |
| Total No. of reflections                            | 221204                  | 199923                  | 51000                   | 66890                   |
| No. of unique reflections                           | 22949                   | 23974                   | 7012                    | 5297                    |
| Completeness (%)                                    | 99.1 (93.1)             | 93.9 (42.3)             | 97.8 (96.9)             | 99.5 (100)              |
| Redundancy                                          | 9.64 (3.04)             | 8.43 (1.56)             | 7.3 (5.0)               | 12.6 (9.1)              |
| $\langle I/\sigma(I) \rangle$                       | 20.25 (1.78)            | 19.05 (2.26)            | 34.28 (1.38)            | 52.94 (20.35)           |
| R <sub>r.i.m.</sub>                                 | 5.0% (62.7%)            | 6.9% (48.8%)            | 4.5% (9.6%)             | 7.0% (12.0%)            |
| Overall B factor from Wilson plot (Å <sup>2</sup> ) |                         |                         | 18.061                  | 17.090                  |

† Only the redundancy-independent merging R factor  $R_{r.i.m.}$  or  $R_{meas}$  should be reported. If these values are not available, they may be estimated by multiplying the conventional  $R_{merge}$  value by the factor  $[N/(N - 1)]^{1/2}$ , where N is the data multiplicity [the  $R_{r.i.m.}$  are estimated from  $R_{merge}$  value as suggested.].

‡ State here if there are any anomalies in the Wilson plot, such as spikes arising from ice rings, etc.

**Table S3 Statistics of Refinement**

|                                      | Native | GolB (TCEP and Au+ soak) |
|--------------------------------------|--------|--------------------------|
| R factor $\ddagger$ (%)              | 16.6   | 20.8                     |
| Rfree $\ddagger$ (%)                 | 19.1   | 23.9                     |
| R.m.s. deviation from ideal geometry |        |                          |
| Bonds (Å)                            | 0.007  | 0.01                     |
| Angles (°)                           | 1.256  | 0.90                     |
| Rms ChirVolume                       | 0.064  | 0.031                    |
| Non-crystallography contents         |        |                          |
| Molecules                            | 1      | 1                        |
| Redisues                             | 65     | 62                       |
| Waters                               | 61     | 35                       |
| Au                                   | -      | 2                        |
| Ramachandran                         |        |                          |
| Preferred regions                    | 96.88% | 97.77%                   |
| Allowed regions                      | 3.12%  | 3.23%                    |
| outliers                             | 0      | 0                        |

## REFERENCES

- (1) Lv, C.; Gao, X.; Li, W.; Xue, B.; Qin, M.; Burtnick, L. D.; Zhou, H.; Cao, Y.; Robinson, R. C.; Wang, W. *Nat. Commun.* 2014, 5.
- (2) Jian, X.; Wasinger, E. C.; Lockard, J. V.; Chen, L. X.; He, C. *J. Am. Chem. Soc.* 2009, 131, 10869.
- (3) Wei, W.; Zhu, T.; Wang, Y.; Yang, H.; Hao, Z.; Chen, P. R.; Zhao, J. *Chem. Sci.* 2012, 3, 1780.
